# Supplementary material for: RP11-295G20.2 facilitates hepatocellular carcinoma progression via the miR-6884-3p/CCNB1 pathway
Source: publisher site journal article supplement (doi:10.18632/aging.103552), 2020-07-20
Supplement: Supplementary file [file aging-v12i14-103552-supplementary-material-SD1.pdf]

## SUPPLEMENTARY FIGURE

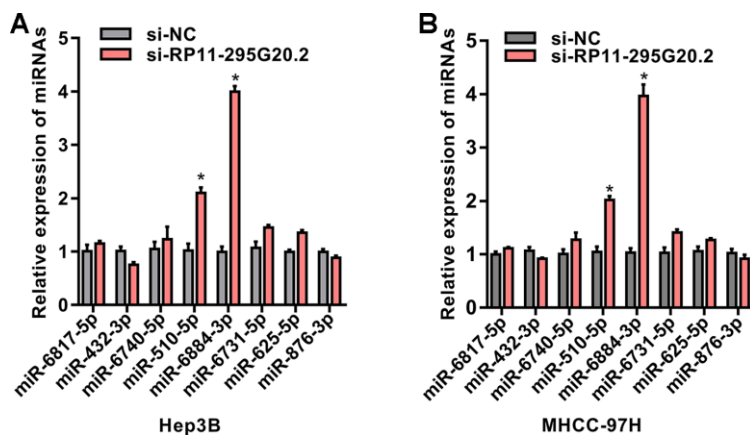

**Supplementary Figure 1.** The expression levels of miR-6817-5p, miR-432-3p, miR-6740-5p, miR-510-5p, miR-6884-3p, miR-6731-5p, miR-625-5p, and miR-876-3p following transfecting si-NC or si-RP11-295G20.2 in Hep3B cell lines (A) or MHCC-97H cell lines (B), \*P < 0.05.
